# Supplementary material for: Supramolecular assembly of calix[4]resorcinarenes and chitosan for the design of drug nanocontainers with selective effects on diseased cells
Source: Royal Society of Chemistry journal article supplement (doi:10.1039/d0nj02163f), 2020-01-01
Supplement: d0nj02163f1.pdf [file d0nj02163f1.pdf]

### Supporting Information

Supramolecular assembly of calix[4]resorcinarenes and chitosan for design of drug nanocontainers with selective effects on diseased cells

Ruslan Kashapov,<sup>\*a</sup> Yuliya Razuvayeva,<sup>a</sup> Albina Ziganshina,<sup>a</sup> Tatiana Sergeeva,<sup>a</sup> Nadezda Kashapova,<sup>a</sup> Anastasiia Sapunova,<sup>a</sup> Alexandra Voloshina,<sup>a</sup> Irek Nizameev,<sup>a</sup> Vadim Salnikov<sup>b,c</sup> and Lucia Zakharova<sup>a</sup>

<sup>a</sup>Arbuzov Institute of Organic and Physical Chemistry, FRC Kazan Scientific Center of RAS, Arbuzov Str. 8, 420088 Kazan, Russia

<sup>b</sup>Kazan Institute of Biochemistry and Biophysics, FRC Kazan Scientific Center of RAS, Lobachevsky Str. 2/31, 420111 Kazan, Russia

<sup>c</sup>Kazan Federal University, Kremlyovskaya Str. 18, 420008 Kazan, Russia

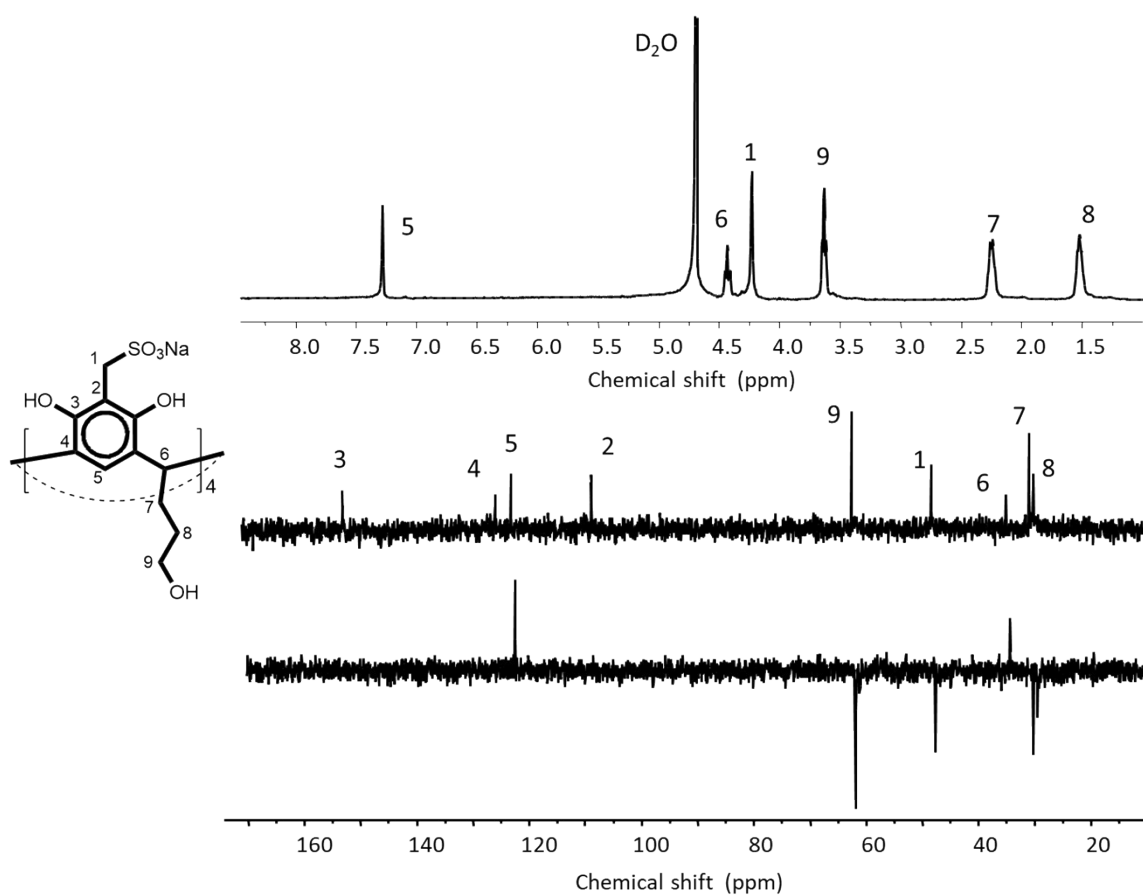

**Figure S1.**  $^1\text{H}$  and  $^{13}\text{C}$  NMR spectra of USR in  $\text{D}_2\text{O}$ ,  $25^\circ\text{C}$ .

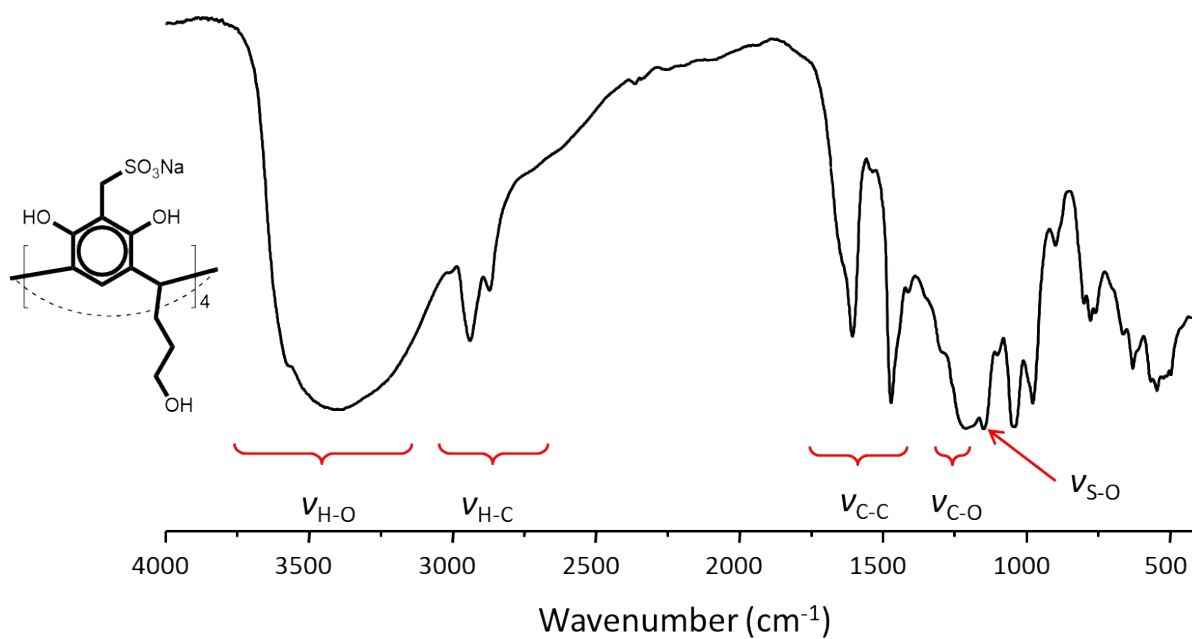

**Figure S2.** IR spectrum of USR,  $25^\circ\text{C}$ .

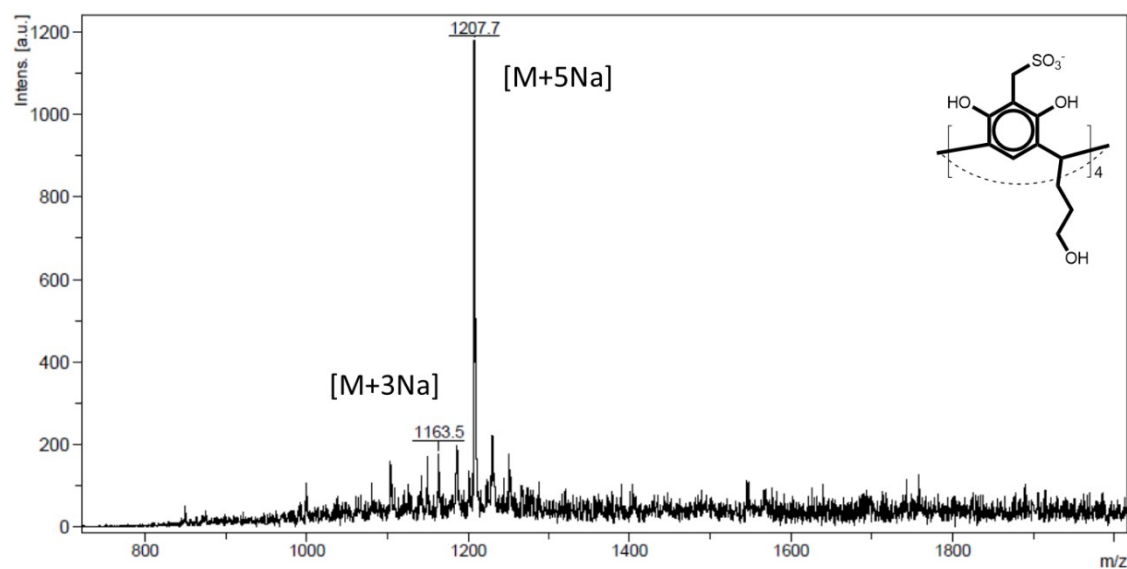

**Figure S3.** MALDI-TOF mass-spectrum of USR in water.

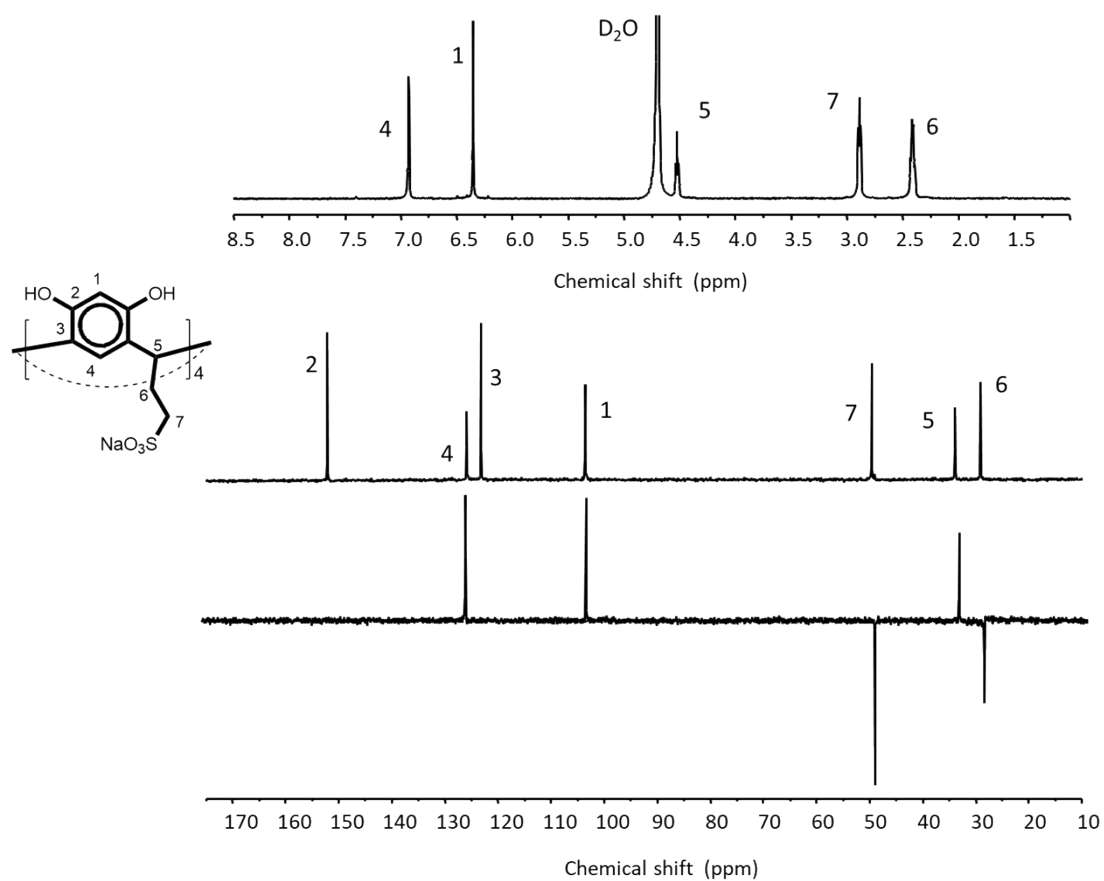

**Figure S4.**  $^1\text{H}$  and  $^{13}\text{C}$  NMR spectra of LSR in  $\text{D}_2\text{O}$ , 25 °C.

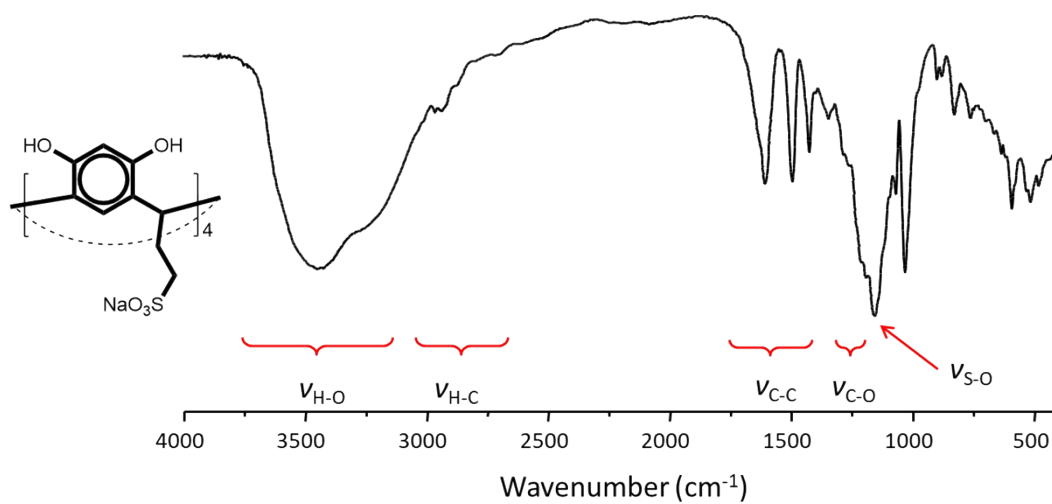

**Figure S5.** IR spectrum of LSR, 25 °C.

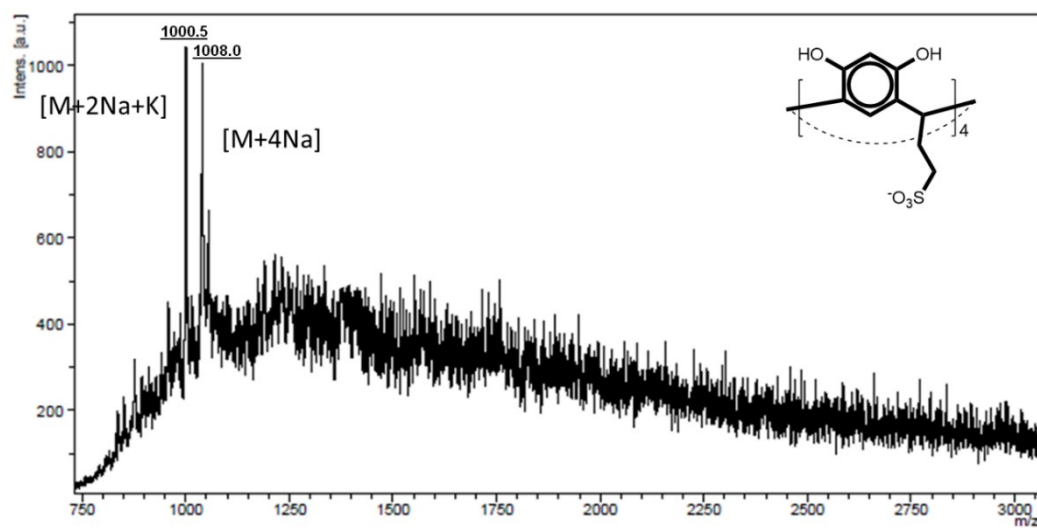

**Figure S6.** MALDI-TOF mass-spectrum of LSR in water.

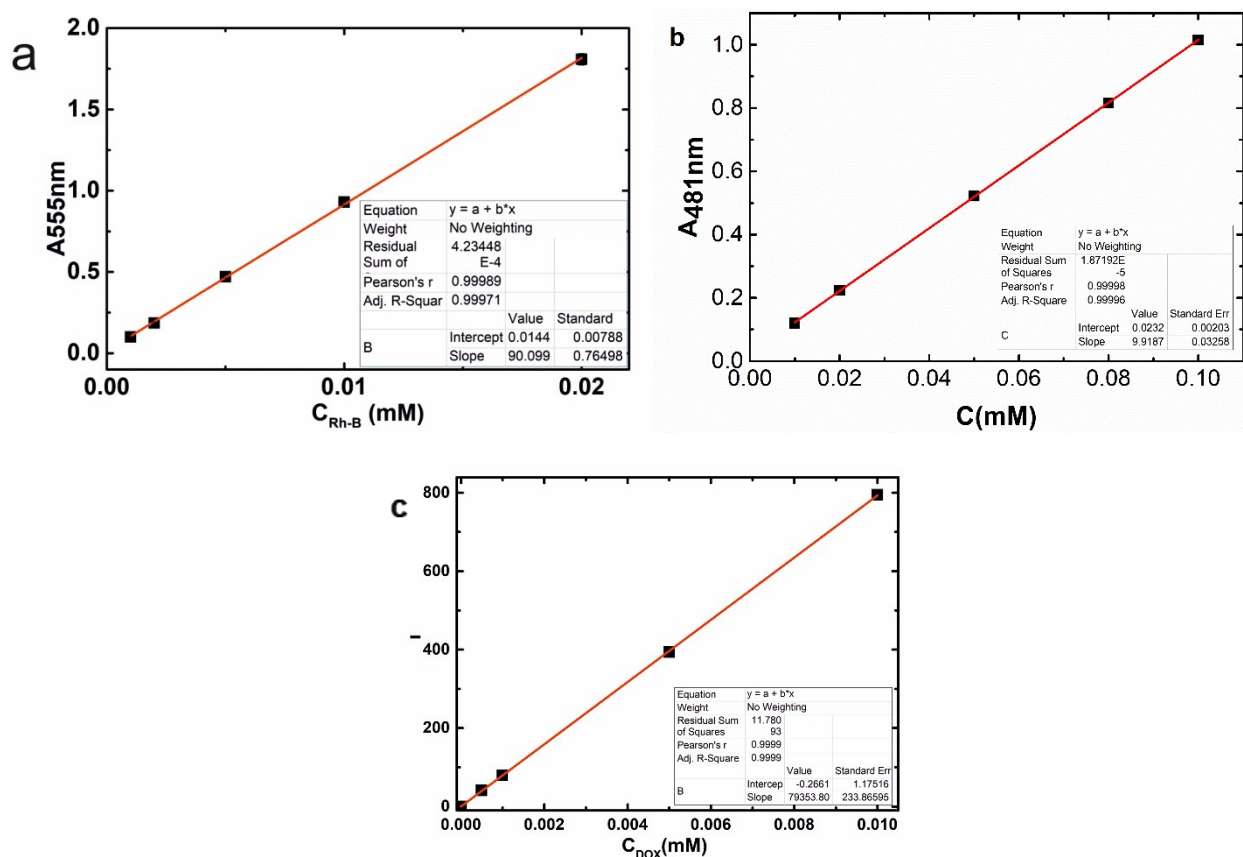

**Figure S7.** Concentration dependence of absorbance of rhodamine B at 555 nm (a), absorbance of DOX in acetic medium (pH=5.5) at 481 nm (b) and fluorescence intensity of DOX (c) in water.

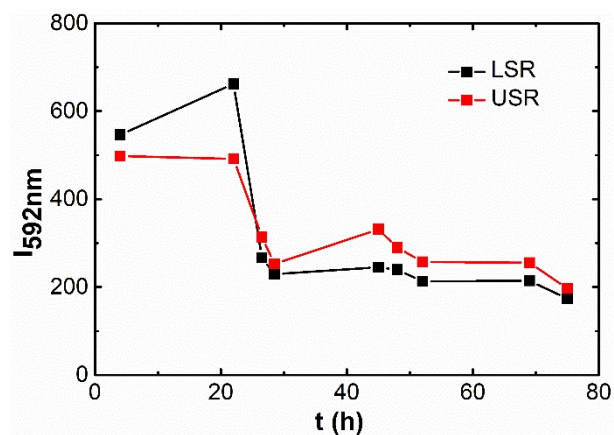

**Figure S8.** Dependence of fluorescence intensity of DOX released from macrocycle-QC aggregates on the time of dialysis.

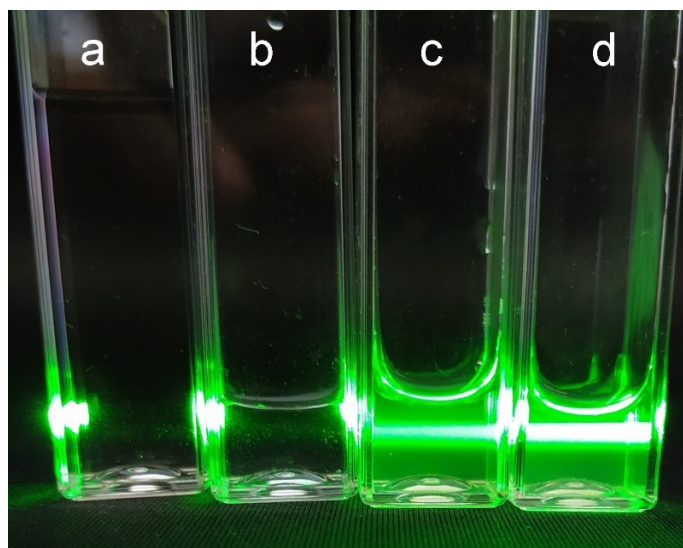

**Figure S9.** Tyndall effect of free USR (a), free QC (b), mixed USR–QC (c) and LSR–QC (d) compositions.

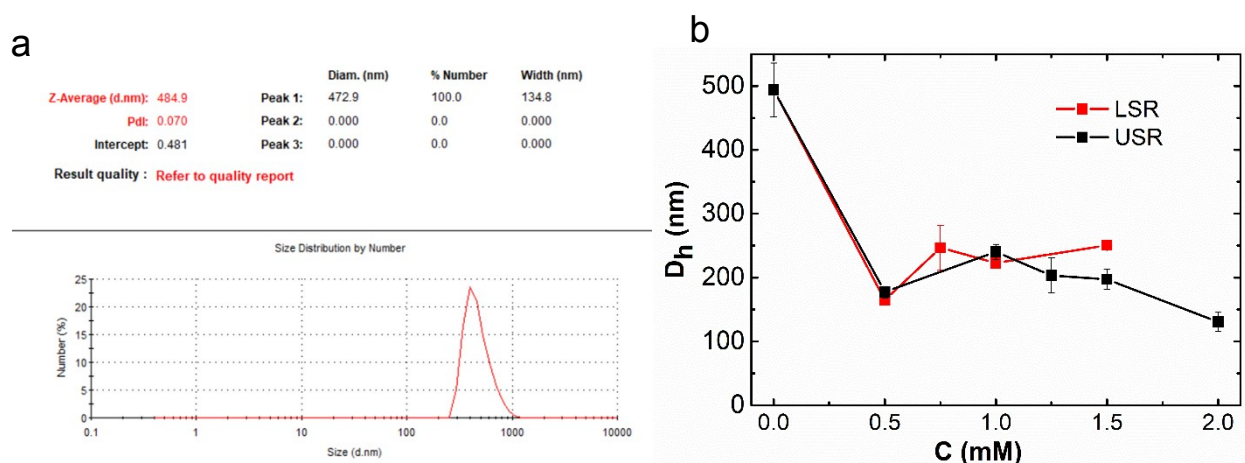

**Figure S10.** (a) Particle size distributions for 1 mg/ml chitosan solution, 25°C, (b) Dependence of the hydrodynamic diameter of aggregates on the concentration of calix[4]resorcinarenes in solution with a fixed chitosan concentration of 1 mg/ml, acetate buffer pH 5.5.

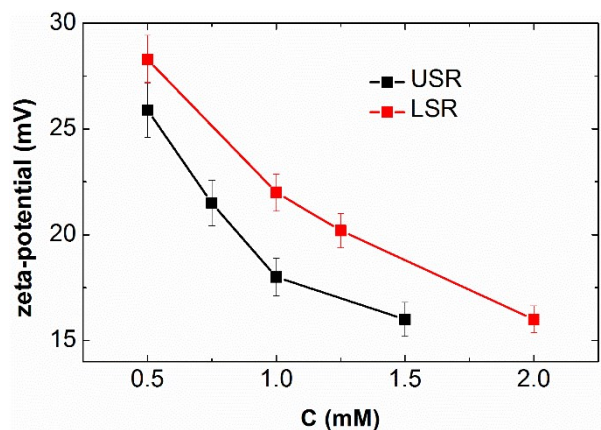

**Figure S11.** Dependence of the zeta potential on the concentration of calix[4]resorcinarenes in solution with a fixed QC concentration of 1 mg/ml, acetate buffer pH 5.5.



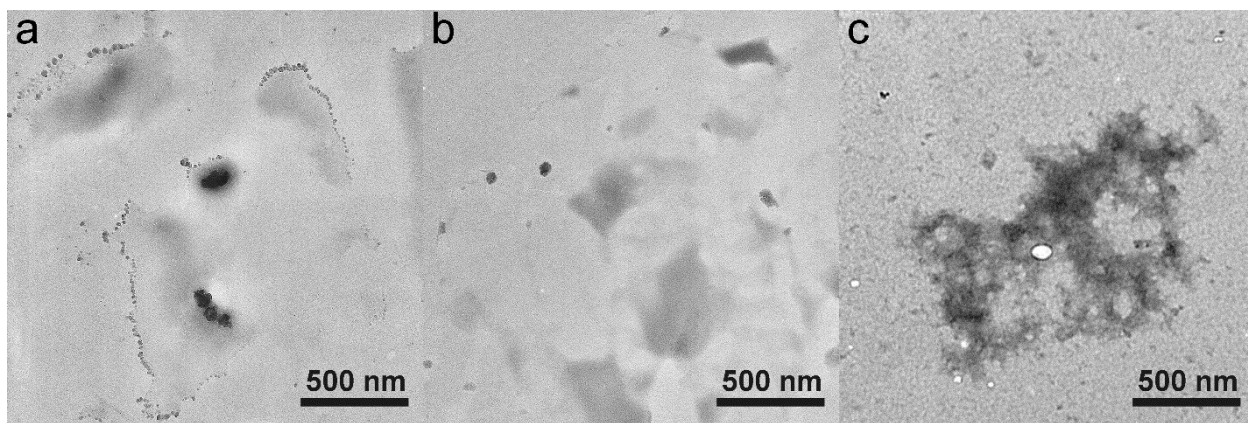

**Figure S12.** TEM images of pure USR (a), LSR (b) and chitosan (c) aqueous solutions.

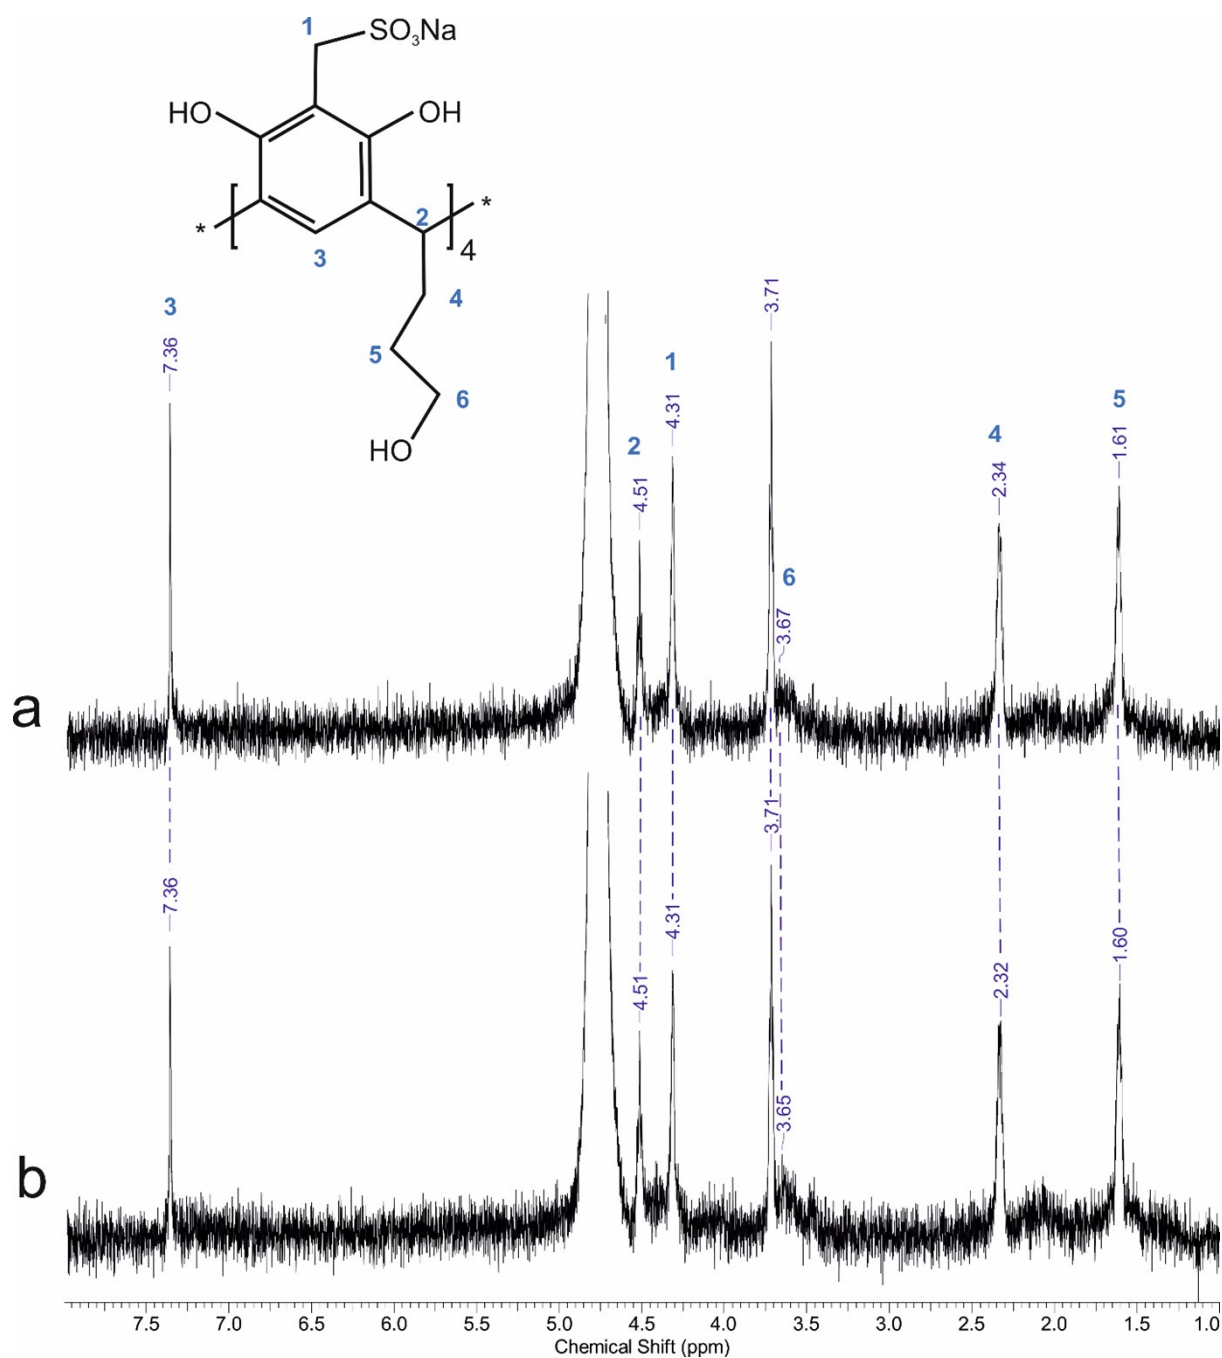

**Figure S13.**  $^1\text{H}$  NMR spectra of USR (a) and USR-QC (b),  $\text{D}_2\text{O}$ , pH 3.3.

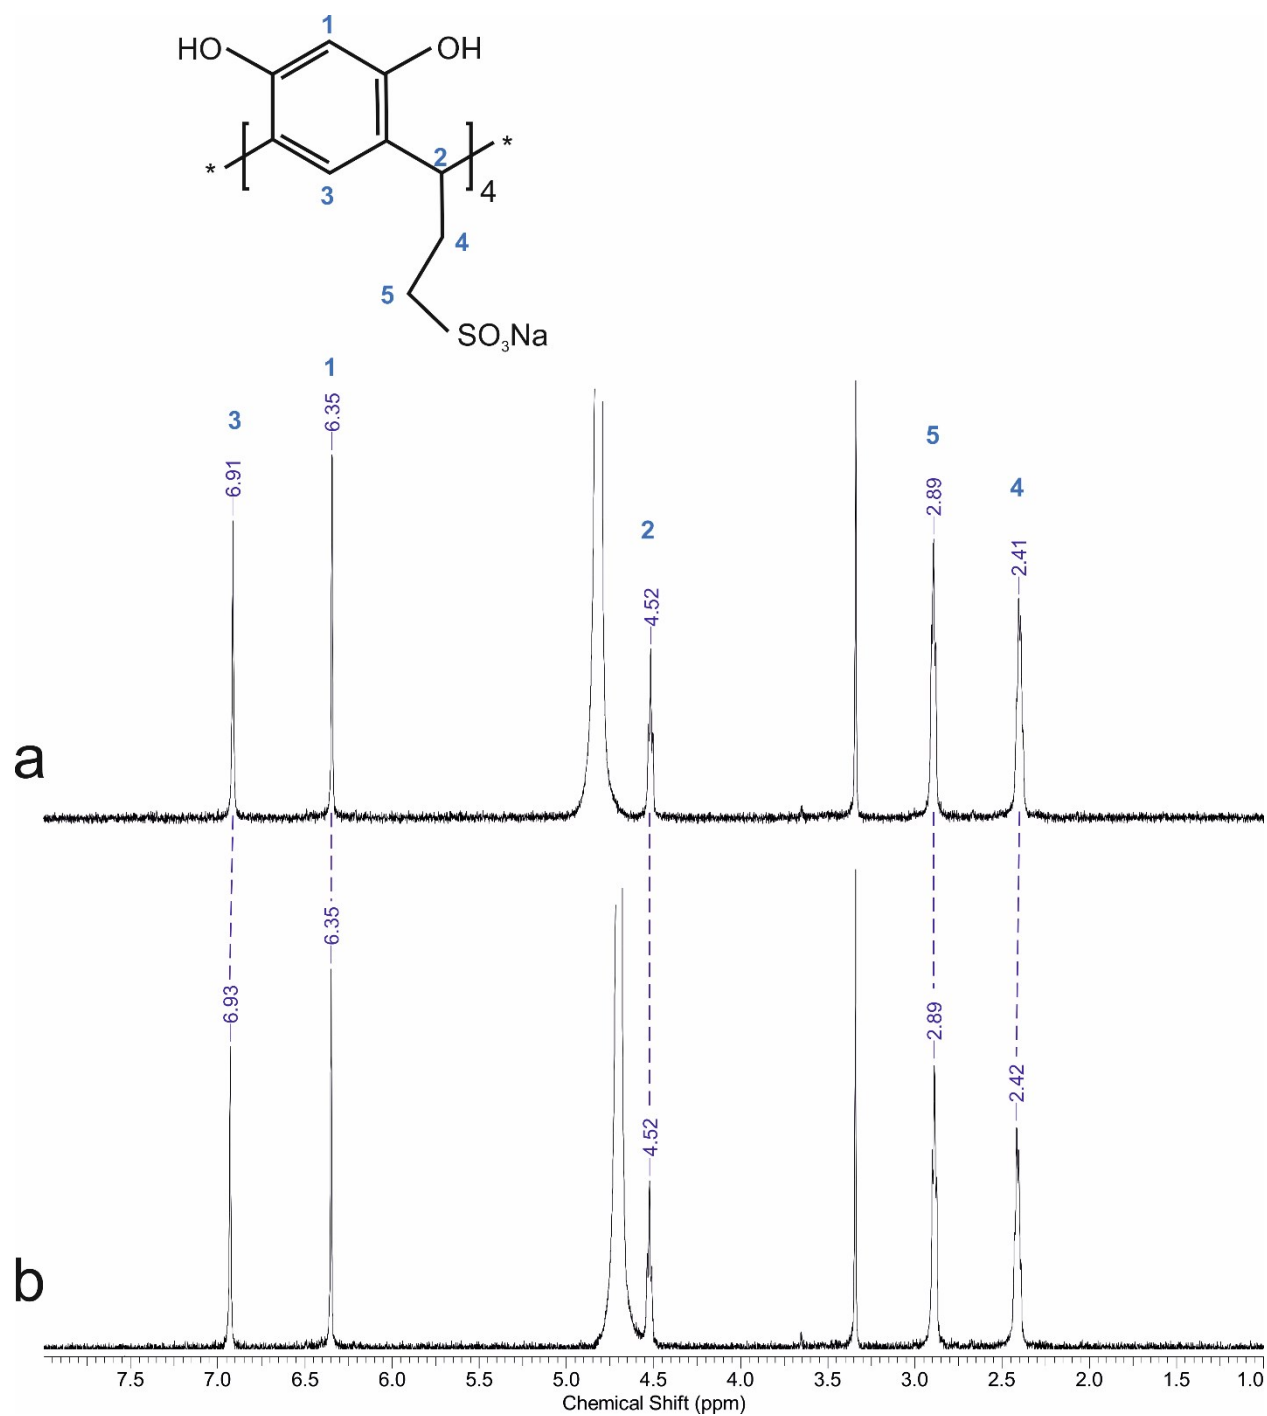

**Figure S14.** <sup>1</sup>H NMR spectra of LSR (a) and LSR-QC (b), D<sub>2</sub>O, pH 3.3.



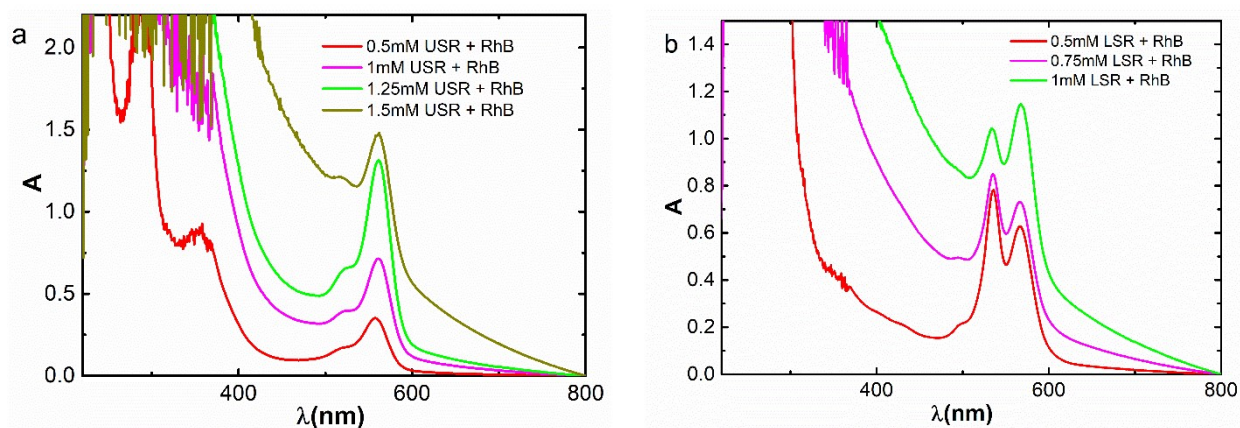

**Figure S15.** UV spectra of USR-1 mg/ml QC (a) and LSR-1 mg/ml QC (b) in the presence of rhodamine B in water (1-cm optical path length).

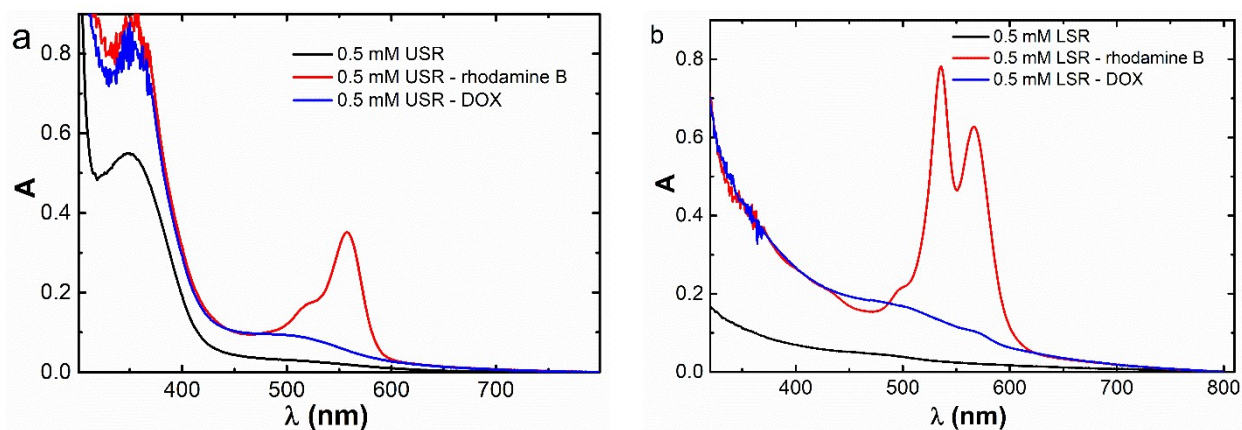

**Figure S16.** UV spectra of 0.5 mM USR-1 mg/ml QC (a) and 0.5 mM LSR-1 mg/ml QC (b) in the absence and presence of rhodamine B and DOX in water (1-cm optical path length).

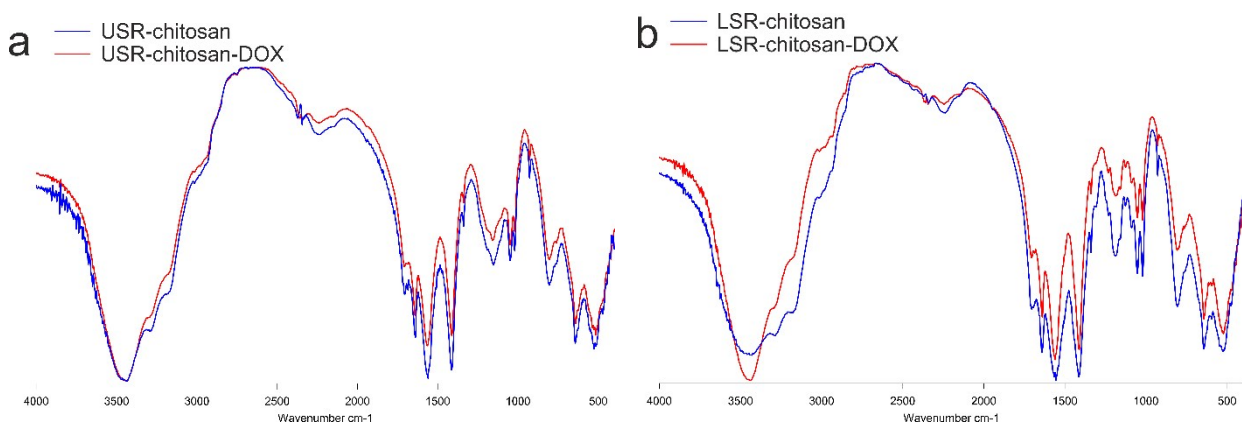

**Figure S17.** FTIR spectra of USR-QC (a) and LSR-QC (b) in the absence and presence of DOX.

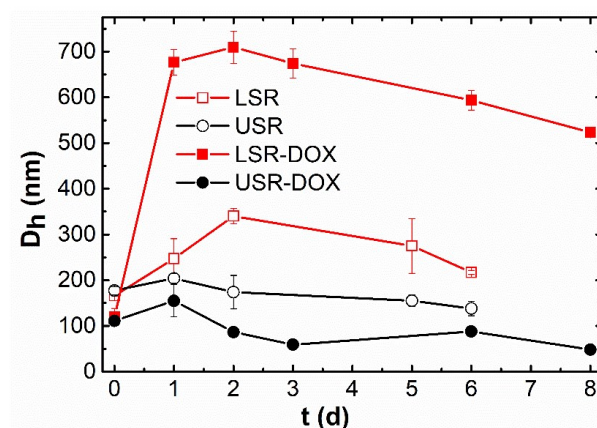

**Figure S18.** Dependence of hydrodynamic diameter of particles (0.5 mM calix[4]resorcinarene–1 mg/ml QC) loaded with DOX on time.

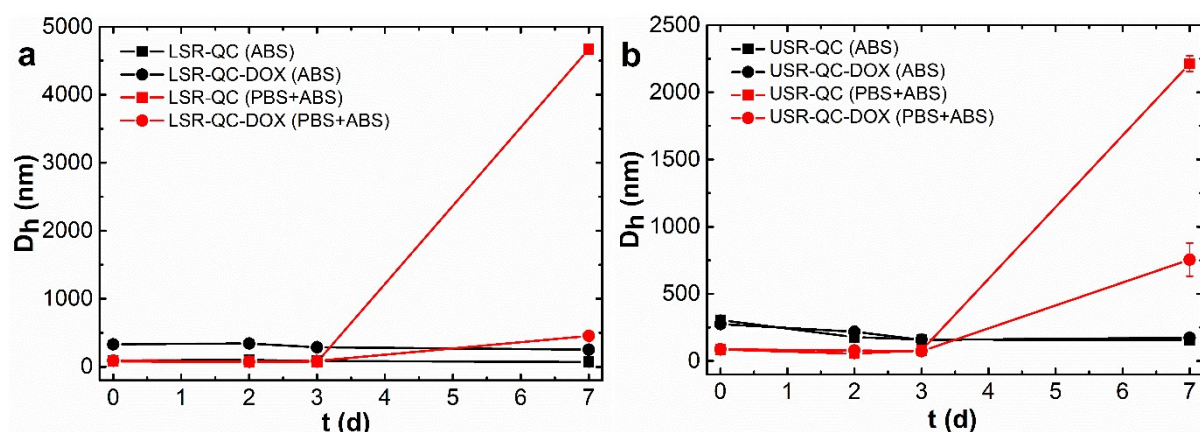

**Figure S19.** Dependence of hydrodynamic diameter of particles in 0.25 mM LSR–0.5 mg/ml QC (a) and 25 mM USR–0.5 mg/ml QC (b) loaded with DOX on time in acetate buffer solution (ABS) and 50% v/v PBS/ABS.

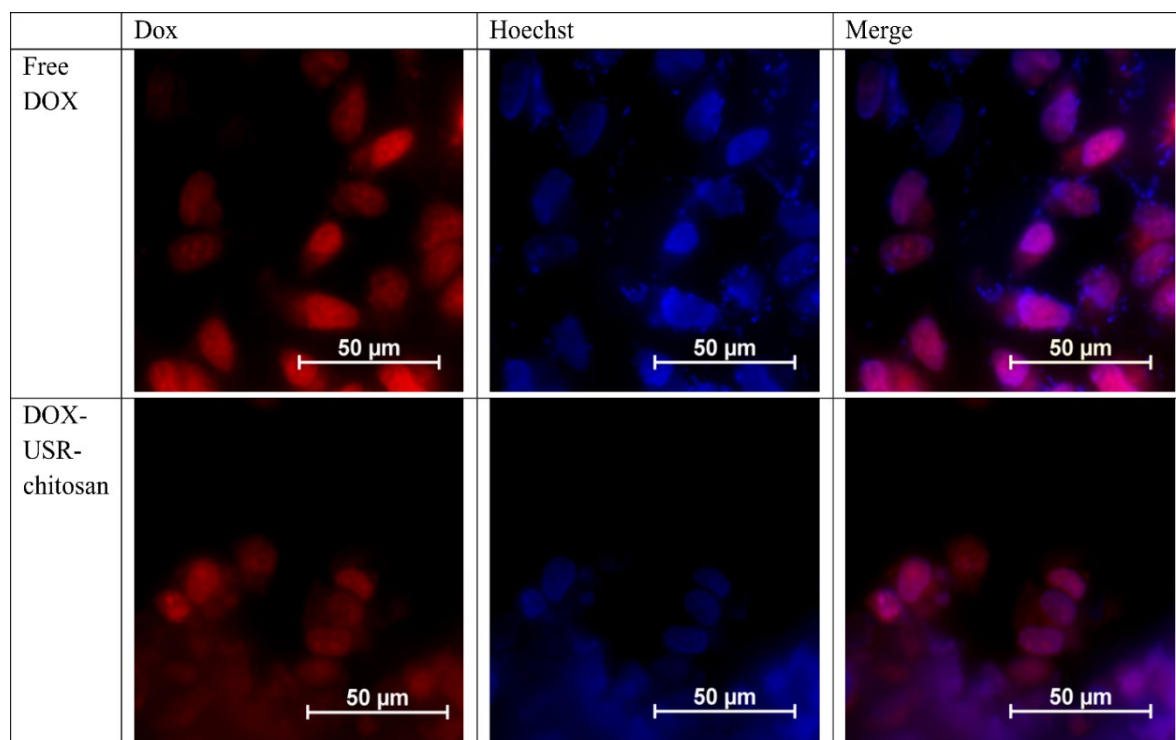

**Figure S20.** Qualitative analysis of DOX distribution in Chang liver cells treated with free DOX and DOX-loaded USR–QC aggregates.
